# Supplementary material for: Optimization of Parameters Using Response Surface Methodology to Develop a Novel Kefir-Like Functional Beverage from Cheese Whey Enriched with Myrtle Juice
Source: Hindawi journal article supplement (doi:10.1155/2021/2984470), 2021-11-12
Supplement: f1 [file 2984470.f1.docx]

Table Supplementary Material. Analyses of variance of Central composite design

| **Source of variation** | **Sum of squares** | **d.f.** | **Mean squares** | **Ratio** | **Signif** |
| --- | --- | --- | --- | --- | --- |
| **Total phenol content (mgEGA/mL)** |  |  |  |  |  |
| Regression | 1.87785E+0003 | 9 | 2.08650E+0002 | 3560.0375 | *** |
| Residues | 3.50253E+0002 | 9 | 3.89170E+0001 |  |  |
| Total | 2.22810E+0003 | 18 |  |  |  |
| **DPPH scavenging activity %** |  |  |  |  |  |
| Regression | 1.48048E+0003 | 9 | 1.64498E+0002 | 670.7909 | *** |
| Residues | 5.28473E+0001 | 9 | 5.87193E+0000 |  |  |
| Total | 1.53333E+0003 | 18 |  |  |  |
| **Lactic acid bacteria (log10CFU/mL)** |  |  |  |  |  |
| Regression | 13.5549 | 9 | 1.5061 | 118.3112 | *** |
| Residues | 1.3585 | 9 | 0.1509 |  |  |
| Total | 14.9134 | 18 |  |  |  |
| **Yeast**  **(log10CFU/mL)** |  |  |  |  |  |
| Regression | 4.6581 | 9 | 0.5176 | 79.9952 | ** |
| Residues | 0.2844 | 9 | 0.0316 |  |  |
| Total | 4.9426 | 18 |  |  |  |
| **Overall acceptability** |  |  |  |  |  |
| Regression | 4.8712 | 9 | 0.5412 | 4.7802 | * |
| Residues | 1.0190 | 9 | 0.1132 |  |  |
| Total | 5.8903 | 18 |  |  |  |

∗*p* < 0*.*05, ∗∗*p* < 0*.*01, and ∗∗∗*p* < 0*.*001.

| **Source of variation** | **Sum of squares** | **d.f.** | **Mean squares** | **Ratio** | **Signif** |
| --- | --- | --- | --- | --- | --- |
| **pH** |  |  |  |  |  |
| Regression | 1.0264 | 9 | 0.1140 | 183.9375 | *** |
| Residues | 0.2011 | 9 | 0.0223 |  |  |
| Total | 1.2275 | 18 |  |  |  |

∗*p* < 0*.*05, ∗∗*p* < 0*.*01, and ∗∗∗*p* < 0*.*001
